# Supplementary material for: Family-based whole-exome sequencing identifies novel loss-of-function mutations of FBN1 for Marfan syndrome
Source: PeerJ journal article supplement (doi:10.7717/peerj.5927), 2018-11-13

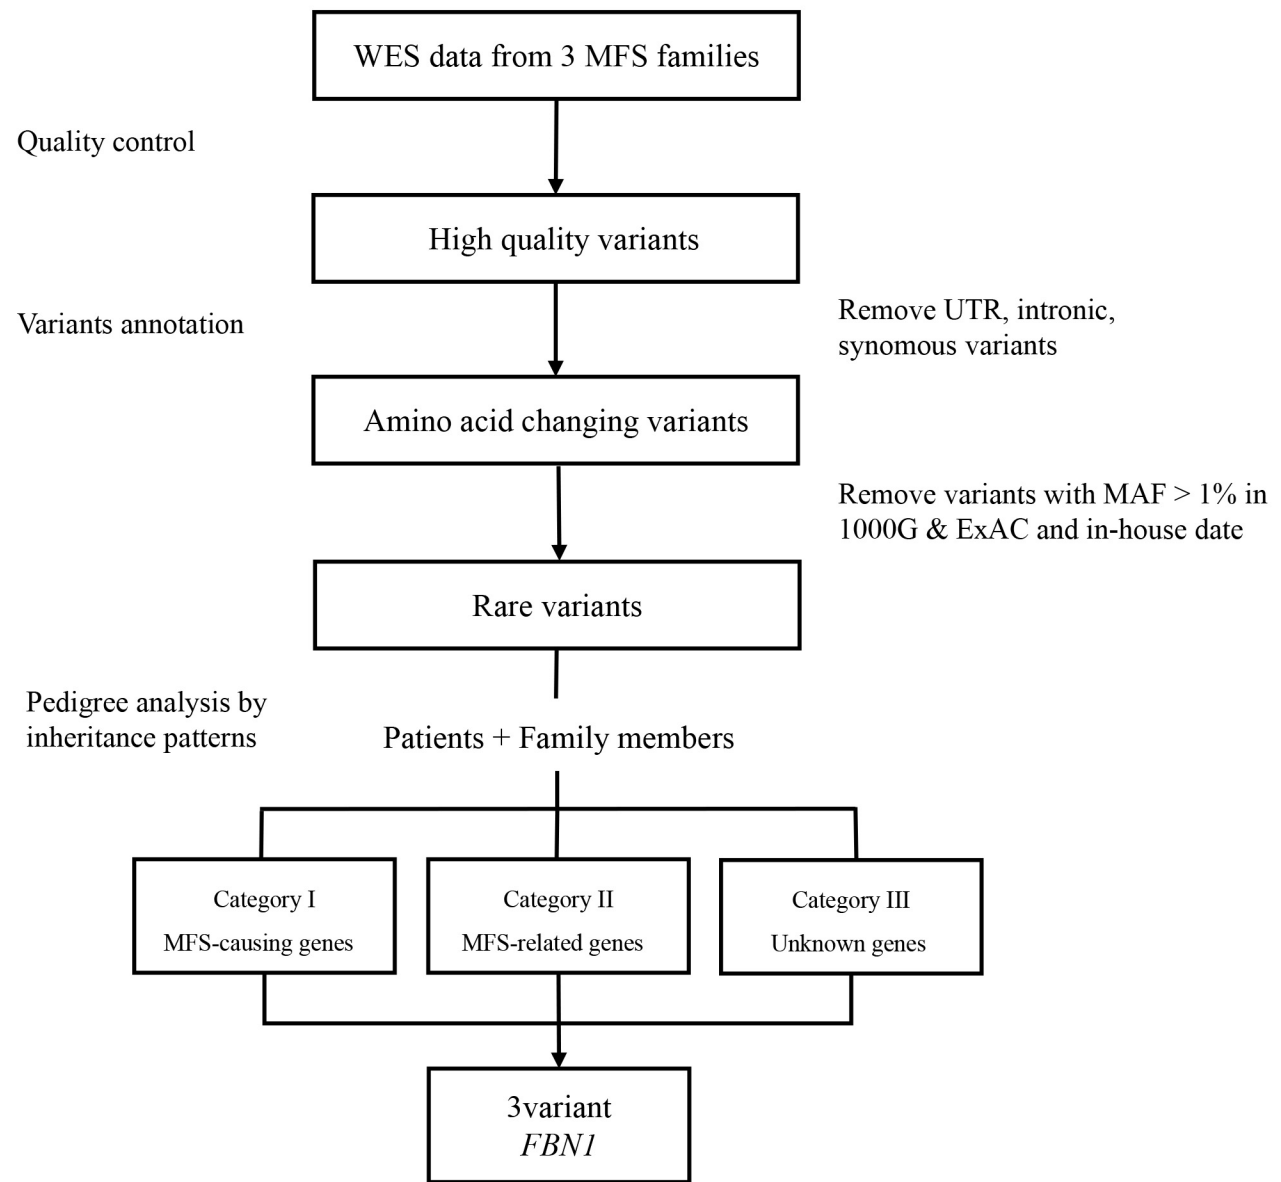

Supplement: Supplementary_Figure_1.pdf [file Supplementary_Figure_1.pdf]
