# Supplementary material for: Family-based whole-exome sequencing identifies novel loss-of-function mutations of FBN1 for Marfan syndrome
Source: PeerJ journal article supplement (doi:10.7717/peerj.5927), 2018-11-13
Supplement: Supplementary_Figure_2.pdf [file Supplementary_Figure_2.pdf]

EGF\_CA pfama, Calcium-binding EGF domain

FXa\_inhibition pfama, Coagulation Factor Xa

TB pfama, TB domain

cEGF pfama, Complement C1r-like EGF-like

Family 1  
c. 5027\_5028insTGTCCTCC,  
p. D1677Vfs\*8

Family 2  
c. 5856delG,  
p. S1953Lfs\*27

Family 3  
c. 8034C>A,  
p. Y2678\*

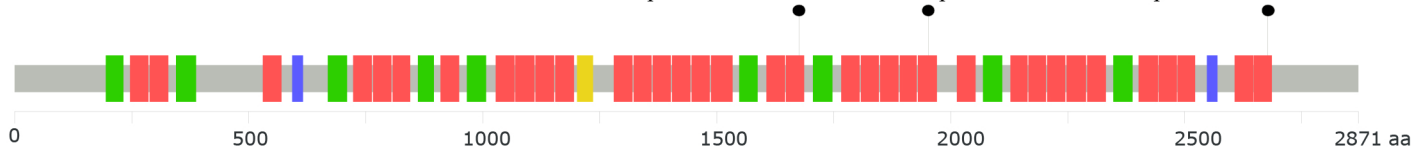

|              |                                              |
|--------------|----------------------------------------------|
| Homo sapiens | T V G N Y T C I C P P <b>D</b> Y M Q V N G G |
| Mus musculus | T V G N Y T C I C P P <b>D</b> Y M Q V N G G |
| Sus scrofa   | T V G N Y T C I C P P <b>D</b> Y M Q V N G G |
| Bos taurus   | T V G N Y T C I C P P <b>D</b> Y M Q V N G G |

D1677

|              |                                                  |
|--------------|--------------------------------------------------|
| Homo sapiens | C R N G Q C I N T V G <b>S</b> F Q C Q C N E G Y |
| Mus musculus | C R N G Q C V N T V G <b>S</b> F Q C R C N E G Y |
| Sus scrofa   | C R N G Q C I N T V G <b>S</b> F Q C Q C N E G Y |
| Bos taurus   | C R N G Q C I N T V G <b>S</b> F Q C Q C N E G Y |

S1953

|              |                                                  |
|--------------|--------------------------------------------------|
| Homo sapiens | G G Y L C G C P P G <b>Y</b> F R I G Q G H C V S |
| Mus musculus | G G Y L C G C P P G <b>Y</b> F R I G Q G H C V S |
| Sus scrofa   | G G Y L C G C P P G <b>Y</b> F R I G Q G H C V S |
| Bos taurus   | G G Y L C A C P P G <b>Y</b> F R I G Q G H C V S |

Y2678
